# Supplementary material
Source: publisher figshare collection journal article supplement (https://acs.figshare.com/ndownloader/files/4842775)
Supplement: Supplementary file 1 [file 4842775]

## **Supporting Information**

### **Preliminary Characterization of Petroleum Sulfonates**

Active Matter percentage (% AM) was determined by means of potentiometric titration protocols, according to the standard methods ASTM D 855-56. Petroleum sulfonates were primarily analyzed by infrared spectroscopy both Shimadzu Prestige 21 MIR-ATR. Prior to these analyses, the obtained petroleum sulfonate extracts were subjected to a dehydration, deoiling, and desalting procedure in order to avoid inaccurate observations caused by non-sulfonated hydrocarbon signals.<sup>15,18</sup> Figure S1 presents the petroleum sulfonates FTIR spectra after dehydration, deoiling and desalting according Basu and Harban.<sup>15,18</sup> Coherently with the results reported by Djedri *et. al.*<sup>16</sup>, the *para*-sulfonic group was observed around 1176 cm<sup>-1</sup> and 1045 cm<sup>-1</sup>. Additionally, characteristic signals of methylene and methyle groups are observed in 2950 and 2850 cm<sup>-1</sup>, and between 1450-1377 cm<sup>-1</sup>.

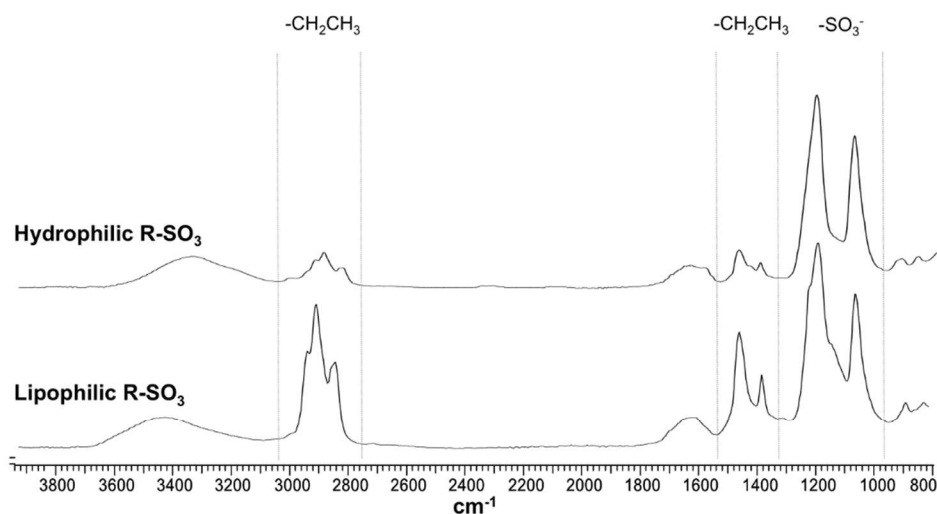

**Figure S1.** Infrared spectrums of hydrophilic and lipophilic petroleum sulfonates prepared from HVGO.

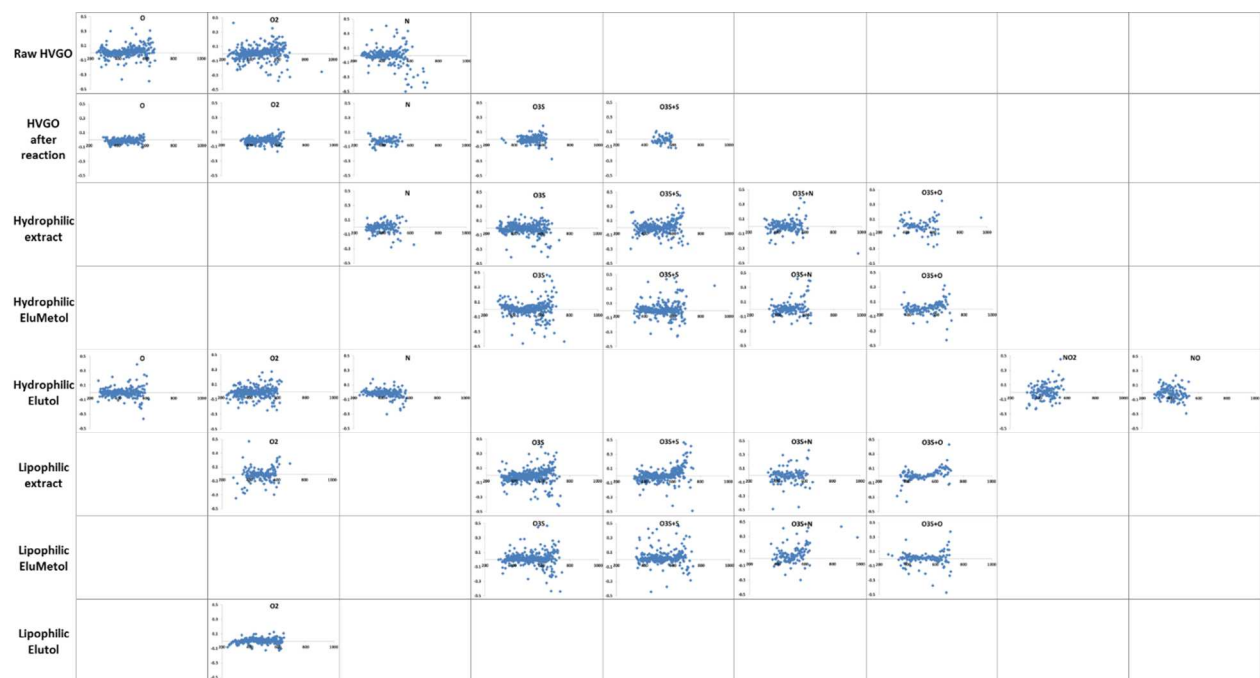

**Figure S2.** Distribution error graphs were the y axis is the error (ppm) and the x axis is the m/z for the classes detected by (-) ESI FT-ICR MS.
